# Supplementary material
Source: HighWire-hosted journal article supplement (https://qualitysafety.bmj.com/highwire/filestream/147646/field_highwire_adjunct_files/2/bmjqs-2015-004828supp_appendix3.pdf)
Supplement: bmjqs-2015-004828supp_appendix3.pdf [file bmjqs-2015-004828supp_appendix3.pdf]

Appendix 3 Patient characteristics, INAES sample compared to national acute public hospitals

|                            | <b>National inpatients*</b> | <b>INAES reviewed charts</b> |
|----------------------------|-----------------------------|------------------------------|
| Number of admissions       | 339,844                     | 1,574                        |
| Mean age (years)           | 55.4                        | 54.2                         |
| Female (%)                 | 53.5                        | 53.4                         |
| Mean length of stay (days) | 7.0                         | 7.4                          |
| Died during admission (%)  | 2.7                         | 4.8 <sup>†</sup>             |

\*based on INAES HIPE search strategy - adult inpatients in acute public hospitals excluding psychiatric and obstetric principal diagnoses

<sup>†</sup>INAES excluded discharges with a hospital stay less than 24 hours but included deaths within 24 hours
